# Supplementary material for: Searching the Internet for psychiatric disorders among Arab and Jewish Israelis: insights from a comprehensive infodemiological survey
Source: PeerJ. 2018 Mar 14;6:e4507. doi: 10.7717/peerj.4507 (PMC5857171; doi:10.7717/peerj.4507)
Supplement: Data S1 — Google Trends generated data for mental health disorders, population size, time (year), Internet penetration index and disease rate, showing the impact of ethnicity on online mental health seeking behavior. [file peerj-06-4507-s001.xlsx]

## Sheet: all data
population	Internet penetration	population*penetration	group (1=Jew; 2=Arab)	year	GT suicide (from all terms)	GT bulimia (from all terms)	GT phobia (from all terms)	GT anxiety (from all terms)	GT depression (from all terms)	depression prevalence (Kaplan et al., 2010)	depression rate	anxiety prevalence (Levav et al., 2007)	anxiety rate	phobia prevalence (Iancu et al., 2011)	phobia rate	anorexia prevalence (Latzer et al., 2008)	bulimia prevalence (Latzer et al., 2008)	GT anorexia (from all terms)	anorexia rate	bulimia rate	suicide prevalence (from Health Ministry of Israel)	suicide rate
5201.5	0.518368	2696.29	1	2004	425	305	121.833	789	309.667	0.106	285.807	0.032	86.2813	0.0196	52.8473	0.2	0.5	686	539.258	1348.15	0.0090679	24.4497
5275.7	0.603	3181.25	1	2005	402	400	215.833	772	309.556	0.106	337.212	0.032	101.8	0.0196	62.3524	0.2	0.5	465	636.249	1590.62	0.0089685	28.531
5353.6	0.579052	3100.01	1	2006	322	473	256.167	778	290.556	0.106	328.601	0.032	99.2004	0.0196	60.7603	0.2	0.5	479	620.003	1550.01	0.0088691	27.4943
5435.8	0.609394	3312.54	1	2007	358.667	418	176.667	630	336.444	0.106	351.13	0.032	106.001	0.0196	64.9259	0.2	0.5	359	662.509	1656.27	0.0087697	29.05
5523.7	0.643	3551.74	1	2008	370.667	257	187.333	562	317.556	0.106	376.484	0.032	113.656	0.0196	69.6141	0.2	0.5	261	710.348	1775.87	0.0086703	30.7946
5655.4	0.670078	3789.56	1	2009	375	154	182.5	582	321.667	0.106	401.693	0.032	121.266	0.0196	74.2754	0.2	0.5	192	757.912	1894.78	0.0085709	32.4799
5752.2	0.75	4314.15	1	2010	407.667	134	176.667	583	316	0.106	457.3	0.032	138.053	0.0196	84.5573	0.2	0.5	136	862.83	2157.07	0.0084715	36.5473
5850.4	0.730762	4275.25	1	2011	329	125	199	516	319.778	0.106	453.177	0.032	136.808	0.0196	83.7949	0.2	0.5	135	855.05	2137.63	0.0083721	35.7928
5949	0.761104	4527.81	1	2012	346.667	105	211	608	303.556	0.106	479.948	0.032	144.89	0.0196	88.745	0.2	0.5	130	905.562	2263.9	0.0082727	37.4572
6052	0.791446	4789.83	1	2013	312	144	205.833	622	302.778	0.106	507.722	0.032	153.275	0.0196	93.8807	0.2	0.5	109	957.966	2394.92	0.0081733	39.1487
6161.8	0.821788	5063.69	1	2014	322.667	148	191.167	668	311.333	0.106	536.751	0.032	162.038	0.0196	99.2484	0.2	0.5	120	1012.74	2531.85	0.0080739	40.8838
6276.8	0.8	5021.44	1	2015	344.333	129	205.667	612	283.333	0.106	532.273	0.032	160.686	0.0196	98.4202	0.2	0.5	113	1004.29	2510.72	0.0079745	40.0435
6390.3	0.89	5687.37	1	2016	304.333	88	173	531	276.556	0.106	602.861	0.032	181.996	0.0196	111.472	0.2	0.5	78	1137.47	2843.68	0.0078751	44.7886
1607.5	0.170244	273.667	2	2004	41.5	0	52.4286	0	40.8333	0.249	68.1431	0.033	9.03102	0.027	7.38902	0.001	0.0047	0	0.273667	1.28624	0.0034989	0.957534
1654.4	0.233	385.475	2	2005	61.5	0	49	0	60	0.249	95.9833	0.033	12.7207	0.027	10.4078	0.001	0.0047	0	0.385475	1.81173	0.003545	1.36651
1700.1	0.267366	454.549	2	2006	100	100	45.1429	0	98.5	0.249	113.183	0.033	15.0001	0.027	12.2728	0.001	0.0047	0	0.454549	2.13638	0.0035911	1.63233
1744.3	0.315927	551.071	2	2007	141.5	0	89.7143	0	164.5	0.249	137.217	0.033	18.1854	0.027	14.8789	0.001	0.0047	0	0.551071	2.59004	0.0036372	2.00436
1785.1	0.319	569.447	2	2008	117.5	113	54.1429	4	123	0.249	141.792	0.033	18.7917	0.027	15.3751	0.001	0.0047	0	0.569447	2.6764	0.0036833	2.09744
1830.2	0.413049	755.962	2	2009	162.5	0	50.5714	3	164.667	0.249	188.235	0.033	24.9468	0.027	20.411	0.001	0.0047	0	0.755962	3.55302	0.0037294	2.81929
1871.4	0.49	916.986	2	2010	110	63	62	5	121.667	0.249	228.33	0.033	30.2605	0.027	24.7586	0.001	0.0047	0	0.916986	4.30983	0.0037755	3.46208
1915.4	0.510171	977.182	2	2011	196.5	17	115	7	242.833	0.249	243.318	0.033	32.247	0.027	26.3839	0.001	0.0047	0	0.977182	4.59275	0.0038216	3.7344
1961.5	0.558732	1095.95	2	2012	206.5	32	161.143	6	238.833	0.249	272.892	0.033	36.1664	0.027	29.5907	0.001	0.0047	0	1.09595	5.15098	0.0038677	4.23882
2007.5	0.607293	1219.14	2	2013	248.5	24	174	1	300.833	0.249	303.566	0.033	40.2316	0.027	32.9168	0.001	0.0047	0	1.21914	5.72996	0.0039138	4.77147
2053.9	0.655854	1347.06	2	2014	279.5	0	190	2	338.667	0.249	335.418	0.033	44.4529	0.027	36.3706	0.001	0.0047	0	1.34706	6.33118	0.0039599	5.33422
2103.3	0.62	1304.05	2	2015	263.5	0	277.429	6	411.5	0.249	324.707	0.033	43.0335	0.027	35.2092	0.001	0.0047	0	1.30405	6.12902	0.004006	5.22401
2155.7	0.78	1681.45	2	2016	401.5	11	467	12	457.5	0.249	418.68	0.033	55.4877	0.027	45.399	0.001	0.0047	0	1.68145	7.9028	0.0040521	6.81339

## Sheet: terms used
ARABIC	HEBREW
Depression	Depression
كآبة	דיכאון
حزن	דכאון
حزين	מדוכא
مكتئب	ירידת מצב רוח
محبط	שפל רוח
احباط	עצוב
اكتئاب	עצב
كئيب
حزين
Suicide	Suicide
انتحار	התאבדות
منتحر	מתאבד
محاولة انتحار	להתאבד
Phobia	Phobia
رهاب	פוביה
هلع	בהלה
فوبيا	בהילות
رعب	בעתה
خوف	הבהלות
خائف	פחד עמוק
مذعور	פחד
مرعوب
مرتعب
مروع
Anxiety	Anxiety
القلق	חרדה
قلق	חרד
جزع	חרדות‎
مهموم	פחד
مضطرب البال	מפחד
اضطرابات‎	דאגה
اضطرابات القلق‎	דאגות
الاضطرابات‎	מתח ופחד‎
Bulimia	Bulimia
الشره المرضي	בולימיה
بوليميا
نوبات الدقر
فرط الشهية
Anorexia	Anorexia
فقدان الشهية	אנורקסיה נרבוזה‎
انوريكسيا	אנורקסיה‎
القهم العصبي	אנורקסיא‎
فقدان الشهية العُصابي	אנורקסית‎
الانوركسيا‎	אנורקסיות‎
الانوريكسيا‎
فقدان الشهيه العصبي‎
فقدان الشهيه العصابي‎
القهم العصبي‎
القهم العصابي‎

## Sheet: depression
2004	231	14	0	0	0	0	245	40.8333		617	0	0	237	168	488	534	431	312	2787	309.667			Year	Israel Arabs	Israel Jews
2005	300	60	0	0	0	0	360	60		756	0	0	226	0	524	547	520	213	2786	309.556			2004	40.8333	309.667
2006	421	100	0	0	70	0	591	98.5		753	161	0	75	52	569	489	356	160	2615	290.556			2005	60	309.556
2007	504	148	0	198	137	0	987	164.5		765	192	0	383	79	524	502	404	179	3028	336.444			2006	98.5	290.556
2008	410	158	0	0	70	100	738	123		644	100	190	181	206	431	512	414	180	2858	317.556			2007	164.5	336.444
2009	568	221	100	0	99	0	988	164.667		773	245	124	192	157	382	471	364	187	2895	321.667			2008	123	317.556
2010	361	264	0	0	105	0	730	121.667		698	357	115	193	117	288	531	376	169	2844	316			2009	164.667	321.667
2011	633	514	48	94	133	35	1457	242.833		669	207	126	234	181	258	722	350	131	2878	319.778			2010	121.667	316
2012	617	567	0	75	145	29	1433	238.833		608	165	152	189	174	242	698	359	145	2732	303.556			2011	242.833	319.778
2013	622	646	33	145	231	128	1805	300.833		590	200	180	227	238	199	610	381	100	2725	302.778			2012	238.833	303.556
2014	649	643	66	83	221	370	2032	338.667		558	319	284	192	198	207	586	345	113	2802	311.333			2013	300.833	302.778
2015	790	848	257	146	385	43	2469	411.5		558	145	135	183	188	194	596	341	210	2550	283.333			2014	338.667	311.333
2016	898	970	155	205	469	48	2745	457.5		466	216	239	211	202	150	486	338	181	2489	276.556			2015	411.5	283.333
	حزن	حزين	مكتئب	احباط	اكتئاب	كئيب		non-jew		דיכאון	מדוכא	מצב רוח ירוד	דיכוי	מדכא	דכאון	עצוב	עצב	שפל רוח		jew			2016	457.5	276.556

## Sheet: bulimia
2004	0	0		305	305			Year	Israel Arabs	Israel Jews
2005	0	0		400	400			2004	0	305
2006	100	100		473	473			2005	0	400
2007	0	0		418	418			2006	100	473
2008	113	113		257	257			2007	0	418
2009	0	0		154	154			2008	113	257
2010	63	63		134	134			2009	0	154
2011	17	17		125	125			2010	63	134
2012	32	32		105	105			2011	17	125
2013	24	24		144	144			2012	32	105
2014	0	0		148	148			2013	24	144
2015	0	0		129	129			2014	0	148
2016	11	11		88	88			2015	0	129
	بوليميا	non-jew		בולימיה	jew			2016	11	88

## Sheet: anorexia
2004	686	686		Year	Israel Arabs	Israel Jews
2005	465	465		2004	0	686
2006	479	479		2005	0	465
2007	359	359		2006	0	479
2008	261	261		2007	0	359
2009	192	192		2008	0	261
2010	136	136		2009	0	192
2011	135	135		2010	0	136
2012	130	130		2011	0	135
2013	109	109		2012	0	130
2014	120	120		2013	0	109
2015	113	113		2014	0	120
2016	78	78		2015	0	113
	אנורקסיה	jew		2016	0	78

## Sheet: suicide
2004	674	348	253	1275	425		83	0	83	41.5			Year	Israel Arabs	Israel Jews
2005	573	414	219	1206	402		123	0	123	61.5			2004	41.5	425
2006	570	170	226	966	322		200	0	200	100			2005	61.5	402
2007	574	232	270	1076	358.667		283	0	283	141.5			2006	100	322
2008	570	307	235	1112	370.667		235	0	235	117.5			2007	141.5	358.667
2009	569	172	384	1125	375		225	100	325	162.5			2008	117.5	370.667
2010	527	199	497	1223	407.667		131	89	220	110			2009	162.5	375
2011	487	190	310	987	329		340	53	393	196.5			2010	110	407.667
2012	542	189	309	1040	346.667		413	0	413	206.5			2011	196.5	329
2013	438	199	299	936	312		497	0	497	248.5			2012	206.5	346.667
2014	484	231	253	968	322.667		529	30	559	279.5			2013	248.5	312
2015	530	225	278	1033	344.333		494	33	527	263.5			2014	279.5	322.667
2016	399	263	251	913	304.333		746	57	803	401.5			2015	263.5	344.333
	התאבדות	מתאבד	להתאבד		jew		انتحار	منتحر		non-jew			2016	401.5	304.333

## Sheet: anxiety
2004	548	194	100	0	842	210.5		471	73	0	100	644	161			Year	Israel Arabs	Israel Jews
2005	591	131	102	100	924	231		227	108	0	0	335	83.75			2004	161	210.5
2006	703	271	79	0	1053	263.25		49	79	100	48	276	69			2005	83.75	231
2007	522	177	148	55	902	225.5		92	95	0	60	247	61.75			2006	69	263.25
2008	575	260	100	70	1005	251.25		48	44	0	32	124	31			2007	61.75	225.5
2009	492	205	60	57	814	203.5		29	128	38	23	218	54.5			2008	31	251.25
2010	457	319	151	92	1019	254.75		80	75	32	29	216	54			2009	54.5	203.5
2011	456	246	132	87	921	230.25		162	125	19	55	361	90.25			2010	54	254.75
2012	482	218	177	96	973	243.25		152	132	16	56	356	89			2011	90.25	230.25
2013	504	213	197	99	1013	253.25		200	86	27	76	389	97.25			2012	89	243.25
2014	546	156	179	60	941	235.25		190	124	42	60	416	104			2013	97.25	253.25
2015	519	201	168	92	980	245		319	177	36	133	665	166.25			2014	104	235.25
2016	432	180	138	59	809	202.25		385	324	24	304	1037	259.25			2015	166.25	245
	חרדה	חרד	דאגות	מודאג		jew		القلق	قلق	جزع	اضطراب		non-jew			2016	259.25	202.25

## Sheet: phobia
2004	269	0	0	0	0	462	731	121.833		0	0	0	226	141	0	0	367	52.4286			Year	Israel Arabs	Israel Jews
2005	263	195	0	100	100	637	1295	215.833		0	0	0	180	63	0	100	343	49			2004	52.4286	121.833		137.505	192.513
2006	179	246	100	162	118	732	1537	256.167		0	0	0	228	88	0	0	316	45.1429			2005	49	215.833		122.267	30.7373
2007	225	229	0	0	0	606	1060	176.667		0	0	100	228	133	0	167	628	89.7143			2006	45.1429	256.167		89.7143	191.167
2008	270	166	73	0	41	574	1124	187.333		0	0	0	179	200	0	0	379	54.1429			2007	89.7143	176.667		45.1429	121.833
2009	180	240	92	30	26	527	1095	182.5		0	0	0	202	71	50	31	354	50.5714			2008	54.1429	187.333		467	256.167
2010	149	210	42	102	22	535	1060	176.667		0	0	157	140	92	45	0	434	62			2009	50.5714	182.5
2011	192	231	0	105	96	570	1194	199		74	49	28	331	155	77	91	805	115			2010	62	176.667
2012	172	214	93	93	152	542	1266	211		194	46	175	425	149	64	75	1128	161.143			2011	115	199
2013	227	247	64	145	37	515	1235	205.833		111	112	129	499	169	188	10	1218	174			2012	161.143	211
2014	196	260	46	66	58	521	1147	191.167		58	193	86	538	175	204	76	1330	190			2013	174	205.833
2015	187	327	70	50	32	568	1234	205.667		344	107	183	681	255	182	190	1942	277.429			2014	190	191.167
2016	206	202	70	52	33	475	1038	173		403	310	461	929	439	480	247	3269	467			2015	277.429	205.667
	פוביה	בהלה	בהילות	בעתה	הבהלות	פחד		jew		رهاب	هلع	فوبيا	رعب	خوف	خائف	روع		non-jew			2016	467	173
